# Supplementary material
Source: publisher figshare collection journal article supplement (https://rs.figshare.com/ndownloader/files/13806803)
Supplement: Supplementary file 1 [file 13806803]

**Table S2**: Results of models (mixed effects Cox proportional hazards, generalized linear mixed effects using a ‘logit’ link and generalized linear mixed effects using a ‘cloglog’ link) examining the effects of experimental treatment, fragment size and seed mass on seed germination and seedling mortality.
